# Supplementary material for: Selection of References for microRNA Quantification in Japanese Flounder (Paralichthys olivaceus) Normal Tissues and Edwardsiella tarda-Infected Livers
Source: MDPI journal article supplement (doi:10.3390/genes13020175), 2022-01-19
Supplement: s1 [file s1]

**Table S2. Reference survey of candidate miRNA for qRT-PCR in other teleost species.**

| species                                                  | Best reference                                                            | application condition                                                                                                                                                               | citation                         |
|----------------------------------------------------------|---------------------------------------------------------------------------|-------------------------------------------------------------------------------------------------------------------------------------------------------------------------------------|----------------------------------|
| Atlantic Cod<br>( <i>Gadus morhua</i> )                  | miR-25-3p, miR-210-5p                                                     | 9 tissues under normal condition                                                                                                                                                    | Andreassen, 2016                 |
| Atlantic salmon<br>( <i>Salmo salar</i> )                | miR-25-3p, miR-455-5p                                                     | 7 tissues under normal condition<br>individuals with infectious salmon anemia                                                                                                       | Johansen and<br>Andreassen, 2014 |
| Blunt snout bream<br>( <i>Megalobrama amblycephala</i> ) | miR-221-3p, miR-103-3p                                                    | 9 tissues under normal condition<br>heat stress, ammonia stress, bacterial challenge, glycolipid stress                                                                             | Liu, 2018                        |
| Yellow River Carp<br>( <i>Cyprinus carpio. var</i> )     | 5S<br>5S, 18S<br>Let-7a, miR-23a                                          | 11 tissues of adult and juvenile individual<br>6 early different developmental stages (morula -- primordial gonad)<br>3 developmental stages (primordial gonad -- adult carp gonad) | Wang, 2019                       |
|                                                          | miR-101a                                                                  | 12 tissues under normal condition                                                                                                                                                   |                                  |
| grass carp<br>( <i>Ctenopharyngodon idella</i> )         | miR-126-3p, miR-101a, miR-192,<br>miR-451, miR-22a<br>miR-126-3p, miR-22a | bacterial infection ( <i>Aeromonas hydrophila</i> S2)<br>18 developmental stages (unfertilized eggs -- 10 days post-hatching)                                                       | Xu, 2014                         |
| Atlantic salmon<br>( <i>Salmo salar</i> )                | miR-99-5p, miR-23a-5p<br>miR-22a, miR-23a                                 | hypoxic stress<br>8 tissues under normal condition                                                                                                                                  | Zavala, 2017                     |
| Chinese Perch<br>( <i>Siniperca chuatsi</i> )            | miR-22a, miR-146a<br>let-7a, miR-26a<br>miR-26a, miR-23a                  | 8 embryonic developmental stages (two-cell stage -- larval stage)<br>6 post-embryonic developmental stages of muscle (20 -- 150 dph)<br>starvation                                  |                                  |
|                                                          |                                                                           |                                                                                                                                                                                     | Zhu, 2015                        |
